# Supplementary material
Source: PubMed Central journal article supplement (PMC2329687)
Supplement: 0711220105_Supplemental_PDF.pdf [file 0711220105_Supplemental_PDF.pdf]

# Supporting Information

Oliveri *et al.* 10.1073/pnas.0711220105

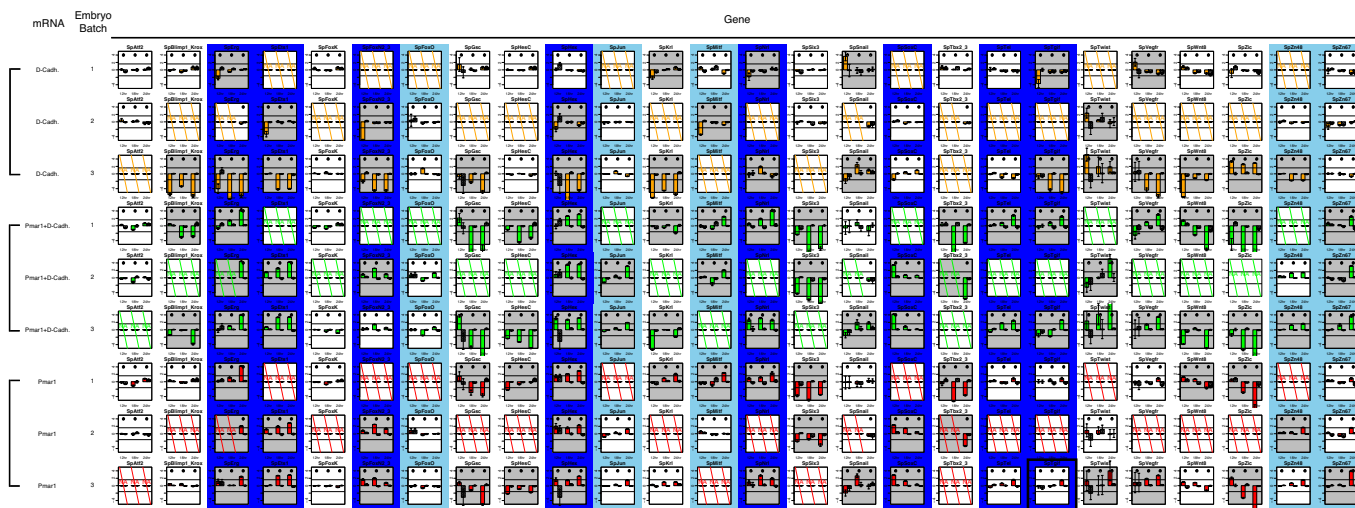

**Fig. S1.** Sensitivity of regulatory genes to *pmar1* expression and the  $\beta$ -catenin initial input. Quantitative measurements are shown for all genes expressed in the skeletogenic micromere lineage that had not been studied by similar means earlier. These genes had been identified by genome analysis (1–5). The QPCR measurements were conducted in embryos containing *pmar1* mRNA in all of the cells; embryos in which the nuclearization of  $\beta$ -catenin had been blocked by injection of  $\Delta$ -cadherin mRNA; and embryos double perturbed with both *pmar1* and  $\Delta$ -cadherin mRNA injection. Each plot shows the effects on a gene (column) in replicate batches of injected embryos (one batch per row) for the three experimental conditions, at three different developmental times: late cleavage (12 h), hatched blastula (18 h), and mesenchyme blastula (24 h). The measurements are expressed as  $\Delta\Delta$ Ct, which is the QPCR cycles at threshold (Ct) normalized by the internal control ubiquitin ( $\Delta$ Ct), and then compared with normalized uninjected embryo values ( $\Delta$ Ct). A positive value means increased expression compared with the uninjected embryos, and a negative value means decreased expression. Columns highlighted by dark blue show the new genes included in the network; columns highlighted by light blue are genes specifically expressed in micromere lineage only after ingress (24 h), which are not relevant for early specification process. These genes are affected by *pmar1* overexpression indirectly. Colored bars are measurements in perturbed embryos; slashed bars in controls. In each plot the gray background indicates a measurement ( $\Delta\Delta$ Ct) over the cutoff ( $\pm 1.6$ ) at any time point, i.e., a significant result; black bordered boxes indicate that the injection control (GFP mRNA) also shows a  $\Delta\Delta$ Ct value relative to uninjected sample over the cutoff ( $\pm 1.6$ ) at any one of the time points analyzed, and thus a questionable result. An indication of level of expression for each gene at each developmental stage is given by the pie plots, which indicate the average Ct in the controls: full black pie is an average Ct of 20, white pie means an average Ct of 40. Generally speaking, a half blank (or less) pie indicates less reliable data. Cross NA lines mean the data are not available. Error bars are standard errors for the four QPCR replicas. Data were processed and illustrated by the software qpcrplot available on request.

- Howard-Ashby M, *et al.* (2006) Identification and characterization of homeobox transcription factor genes in *Strongylocentrotus purpuratus*, and their expression in embryonic development. *Dev Biol* 300:74–89.
- Howard-Ashby M, *et al.* (2006) Gene families encoding transcription factors expressed in early development of *Strongylocentrotus purpuratus*. *Dev Biol* 300:90–107.
- Materna SC, Howard-Ashby M, Gray RF, Davidson EH (2006) The C2H2 zinc finger genes of *Strongylocentrotus purpuratus* and their expression in embryonic development. *Dev Biol* 300:108–120.
- Rizzo F, Fernandez-Serra M, Squarzone P, Archimandritis A, Arnone MI (2006) Identification and developmental expression of the ets gene family in the sea urchin (*Strongylocentrotus purpuratus*). *Dev Biol* 300:35–48.
- Tu Q, Brown CT, Davidson EH, Oliveri P (2006) Sea urchin Forkhead gene family: Phylogeny and embryonic expression. *Dev Biol* 300:49–62.

## Expression Levels of skeletogenic lineage transcription factors

| Gene           | 0hr   | 5hr   | 7hr   | 9.5hr | 12hr  | 15hr  | 18hr | 21hr | 24hr  | 27hr | 30hr  | 33hr | 40hr  | 45hr  | 48hr  | 52hr | 70hr  |
|----------------|-------|-------|-------|-------|-------|-------|------|------|-------|------|-------|------|-------|-------|-------|------|-------|
| <i>pmar1</i>   | 3     | 8     | 585   | 399   | 430   | 134   | 102  | 86   | 69    | 73   | 119   | 101  | 129   | 107   | 92    | 66   | 115   |
| <i>alx1</i>    | 28    | 62    | 316   | 988   | 6091  | 2826  | 1985 | 1481 | 2371  | 2412 | 959   | 873  | 913   | 1025  | 941   | 562  | 1063  |
| <i>ets1</i>    | 60623 | 49209 | 25927 | 39015 | 39519 | 10761 | 6593 | 5403 | 6852  | 4013 | 1695  | 2371 | 1870  | 2233  | 2296  | 1549 | 3013  |
| <i>tbr</i>     | 3463  | 2975  | 3411  | 2351  | 2874  | 2937  | 6453 | 6052 | 7448  | 4189 | 1716  | 2778 | 2725  | 2417  | 1910  | 877  | 444   |
| <i>soxC</i>    | 586   | 577   | 506   | 1688  | 4004  | 5760  | 9735 | 6448 | 11032 | 8259 | 13920 | 6565 | 8823  | 4866  | 9435  | 6431 | 13551 |
| <i>tel</i>     | 3715  | 5173  | 4439  | 3516  | 1336  | 1551  | 1589 | 1137 | 1453  | 1049 | 1411  | 871  | 1224  | 929   | 1334  | 1087 | 1754  |
| <i>foxN2_3</i> | 161   | 49    | 49    | 125   | 408   | 1131  | 2406 | 1461 | 1638  | 2284 | 2373  | 1488 | 2847  | 1758  | 1695  | 1779 | 2400  |
| <i>erg</i>     | 3     | 1     | 2     | 16    | 37    | 145   | 792  | 786  | 837   | 675  | 1257  | 936  | 773   | 765   | 648   | 608  | 687   |
| <i>hex</i>     | 2     | 1     | 8     | 4     | 51    | 249   | 511  | 261  | 502   | 525  | 1014  | 551  | 682   | 920   | 1304  | 951  | 1641  |
| <i>tgif</i>    | 188   | 59    | 48    | 52    | 146   | 75    | 361  | 759  | 1323  | 1699 | 3229  | 2487 | 6889  | 4635  | 7952  | 6414 | 7625  |
| <i>dri</i>     | 3     | 8     | 11    | 16    | 74    | 446   | 1058 | 734  | 705   | 805  | 3340  | 3109 | 16336 | 10054 | 15020 | 8843 | 13327 |
| <i>foxB</i>    | 198   | 8     | 28    | 41    | 27    | 349   | 250  | 311  | 904   | 1197 | 676   | 281  | 336   | 357   | 509   | 462  | 1051  |
| <i>foxO</i>    | 147   | 244   | 216   | 369   | 247   | 520   | 876  | 680  | 1466  | 1767 | 4678  | 2027 | 4941  | 2984  | 5532  | 4667 | 9505  |
| <i>jun</i>     | 10761 | 2688  | 6734  | 2766  | 2038  | 1916  | 2298 | 1062 | 1740  | 1576 | 2800  | 762  | 1538  | 1219  | 1852  | 1469 | 3406  |
| <i>vegfr</i>   | 15    | 142   | 10    | 185   | 11    | 64    | 134  | 366  | 637   | 1185 | 509   | 674  | 1081  | 1093  | 782   | 594  | 1627  |
| <i>gsc</i>     | 21    | 176   | 2     | 61    | 59    | 342   | 1114 | 1927 | 3912  | 4814 | 2924  | 3240 | 3275  | 5155  | 3560  | 2336 | 2205  |
| <i>snail</i>   | 4     | 1     | 2     | 4     | 2     | 2     | 2    | 3    | 26    | 37   | 81    | 24   | 127   | 162   | 173   | 180  | 176   |

**Fig. S2.** High-resolution temporal profiles of transcription factors expressed in the skeletogenic lineage. The levels of expression for each gene are given as number of transcripts per embryo. Measurements are obtained by QPCR using ubiquitin as internal standard (1) on unperturbed embryos. Samples were collected roughly every 3 h from unfertilized egg (0 h) to larval stage (70 h) as indicated. One hundred-fifty molecules per embryo is used as cutoff for a significant level of expression. Color keys are: dark blue, 0–149; light blue, 150–1,000; green, 1,000–10,000, and yellow >10,000 transcripts per embryo. Data show the common logarithms of the transcript numbers. *Ets1*, *tbr*, *soxC* and *tel*, are maternally expressed in all of the cells of the embryo (striped colors) but by cleavage stage (7–12 h) they have become restricted to the skeletogenic micromere lineage (2–4). *Jun* and *foxO* are initially expressed ubiquitously and become localized to the skeletogenic lineage only after ingress [24 h (3, 5)]. In *S. purpuratus snail* is not expressed at significant levels until gastrulation. Thus it is not relevant for the specification of this lineage, contrary to the case in another species, *L. variegatus* (6). Spatial expression pattern of these genes was confirmed at high resolution by *in situ* hybridization (data not shown). The usual sensitivity of this procedure is 20–40 transcripts per cell.

1. Oliveri P, Carrick DM, Davidson EH (2002) A regulatory gene network that directs micromere specification in the sea urchin embryo. *Dev Biol* 246:209–228.
2. Howard-Ashby M, et al. (2006) Gene families encoding transcription factors expressed in early development of *Strongylocentrotus purpuratus*. *Dev Biol* 300:90–107.
3. Rizzo F, Fernandez-Serra M, Squarizoni P, Archimandritis A, Arnone MI (2006) Identification and developmental expression of the ets gene family in the sea urchin (*Strongylocentrotus purpuratus*). *Dev Biol* 300:35–48.
4. Croce J, Lhomond G, Lozano JC, Gache C (2001) ske-T, a T-box gene expressed in the skeletogenic mesenchyme lineage of the sea urchin embryo. *Mech Dev* 107:159–162.
5. Tu Q, Brown CT, Davidson EH, Oliveri P (2006) Sea urchin Forkhead gene family: Phylogeny and embryonic expression. *Dev Biol* 300:49–62.
6. Wu SY, McClay DR (2007) The Snail repressor is required for PMC ingress in the sea urchin embryo. *Development* 134:1061–1070.

Embryo  
Morpholino  
Batch

Gene

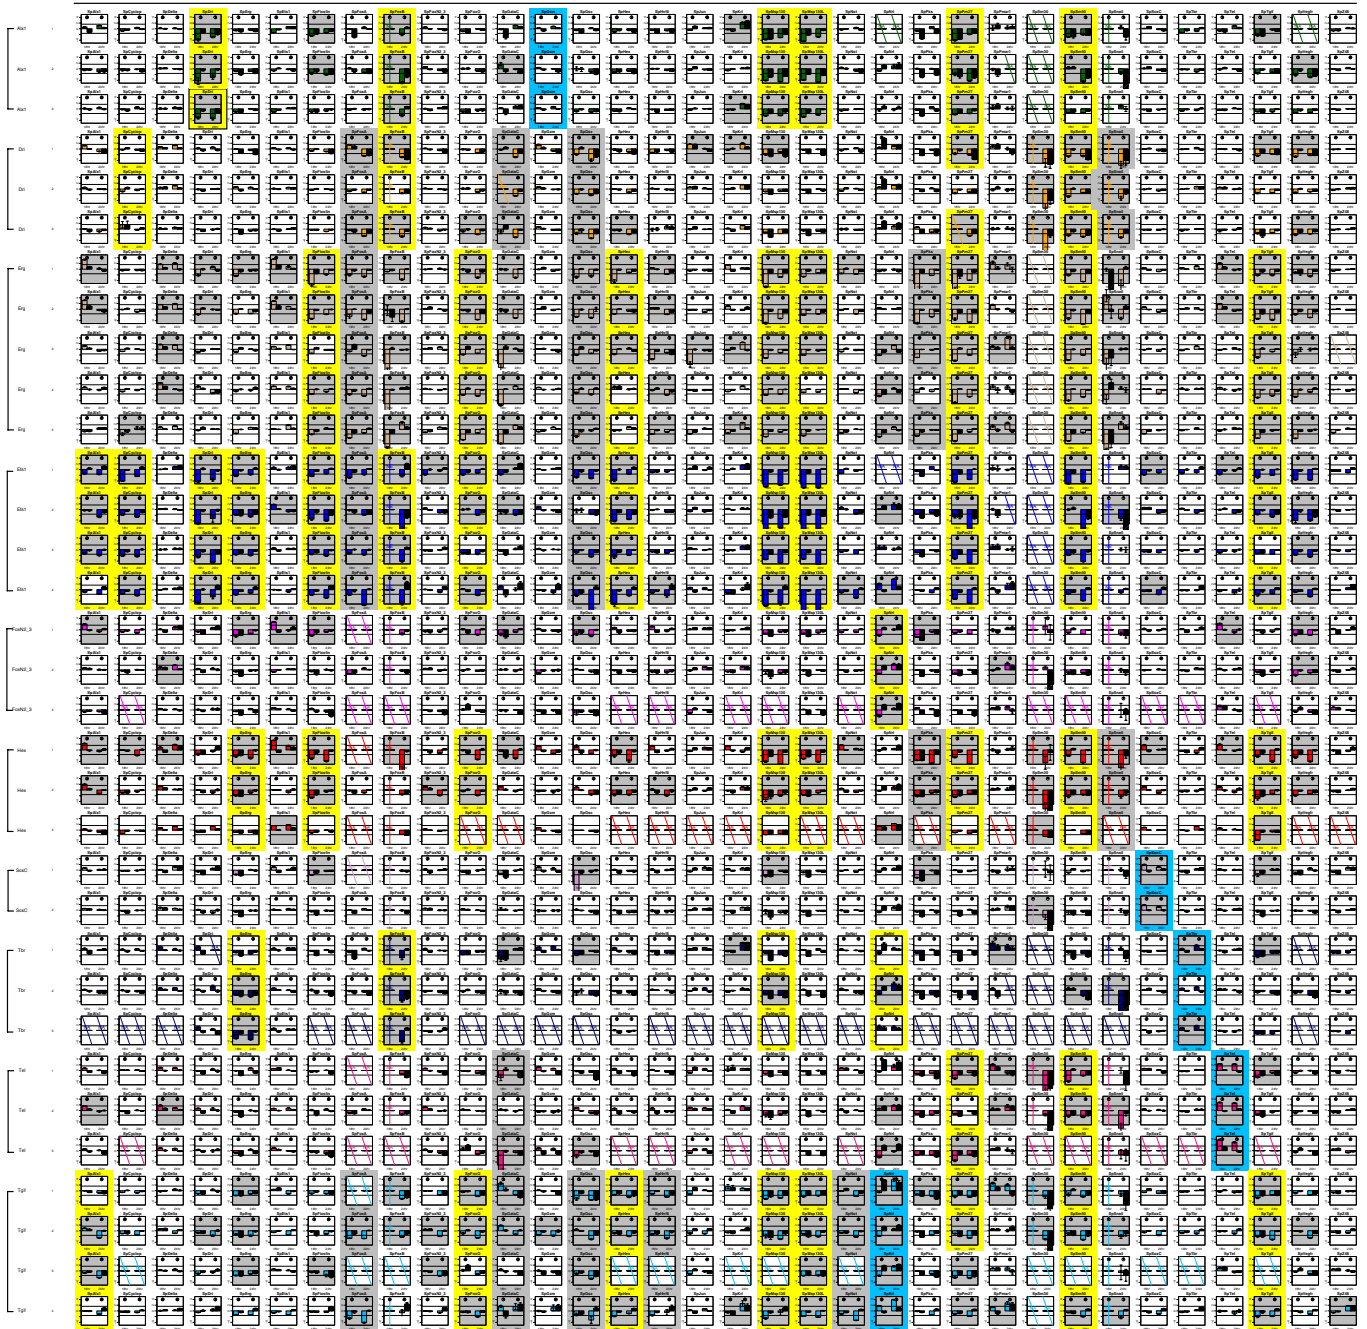

**Fig. S3.** Functional linkage analysis for the regulatory genes expressed in the skeletogenic micromere lineage. Expression of regulatory genes *alx1*, *dri*, *erg*, *ets1*, *foxN2/3*, *hex*, *soxC*, *tbr*, *tgif*, and *tel* was blocked with specific morpholinos (see *Materials and Methods*). The effects of those perturbations were quantified on all of the other genes of the skeletogenic micromere lineage and some mesodermal and endodermal genes. For explanation of diagrams see Fig. S1. In yellow are highlighted positive (activation) linkages occurring in the micromere domain, in blue are negative (repression) linkages in the same domain, and in gray are positive and negative linkages occurring in domains other than micromeres, which may indicate indirect linkages.

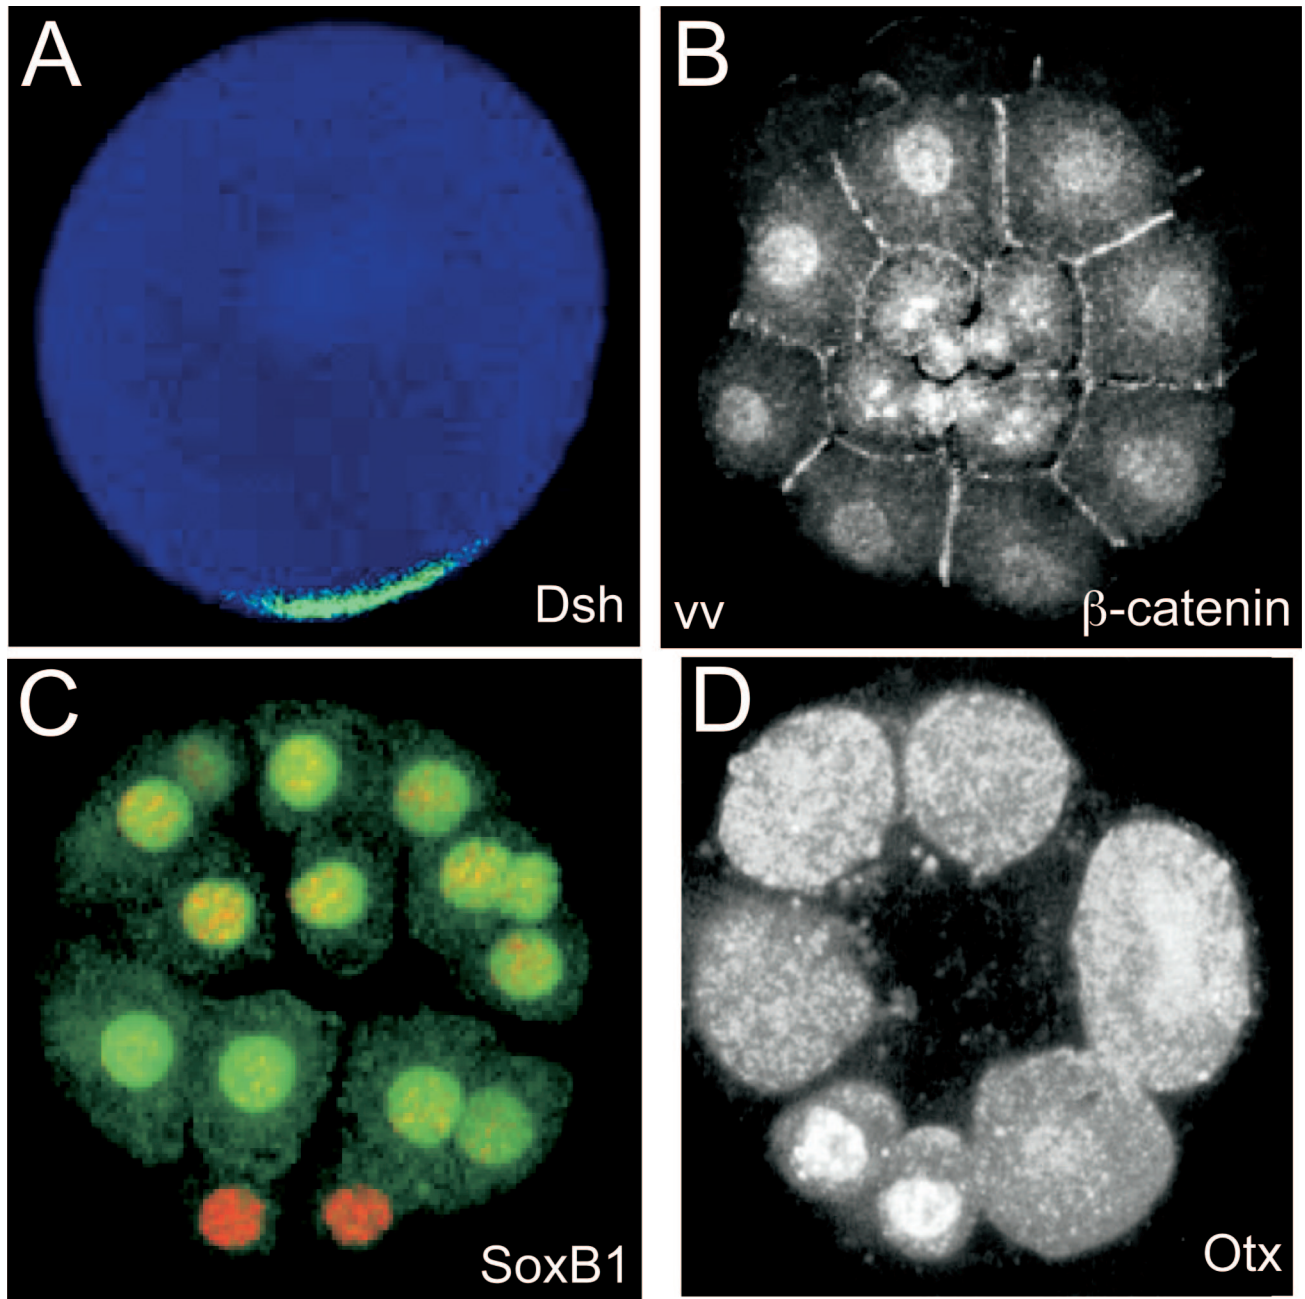

**Fig. 54.** Initial regulatory state. Immunocytological demonstrations of primordial anisotropies of regulatory significance in micromeres. (A) Localization of Dsh in an unfertilized egg [modified from Weitzel *et al.* (1)]. (B) Nuclear localization of  $\beta$ -catenin in the eight veg2 cells and large and small micromeres of a sixth-cleavage embryo, vegetal view (vv). This is a cell-autonomous, maternally loaded early function of the sea urchin embryo. [Reproduced with permission from ref. 2 (Copyright 1999, The Company of Biologists)]. (C) Nuclear localization of the SoxB1 transcription factor in all of the cells of a fourth-cleavage embryo except the micromeres; DNA is stained in orange and Soxb1 in green [modified from Kenny *et al.* (3)]. (D) Nuclearization of Otx factor in micromeres of a fourth-cleavage embryo [Reproduced with permission from ref. 4 (Copyright 1996, Wiley-Liss).]

1. Weitzel HE, *et al.* (2004) Differential stability of  $\beta$ -catenin along the animal-vegetal axis of the sea urchin embryo mediated by dishevelled. *Development* 131:2947–2956.

2. Logan CY, Miller JR, Ferkowicz MJ, McClay DR (1999) Nuclear  $\beta$ -catenin is required to specify vegetal cell fates in the sea urchin embryo. *Development* 126:345–357.

3. Kenny AP, Kozlowski D, Oleksyn DW, Angerer LM, Angerer RC (1999) SpSoxB1, a maternally encoded transcription factor asymmetrically distributed among early sea urchin blastomeres. *Development* 126:5473–5483.

4. Chuang CK, Wikramanayake AH, Mao CA, Li X, Klein WH (1996) Transient appearance of *Strongylocentrotus purpuratus* Otx in micromere nuclei: Cytoplasmic retention of SpOtx possibly mediated through an alpha-actinin interaction. *Dev Genet* 19:231–237.





## Double perturbation Ets1 Morpholino and Alx1 MOE

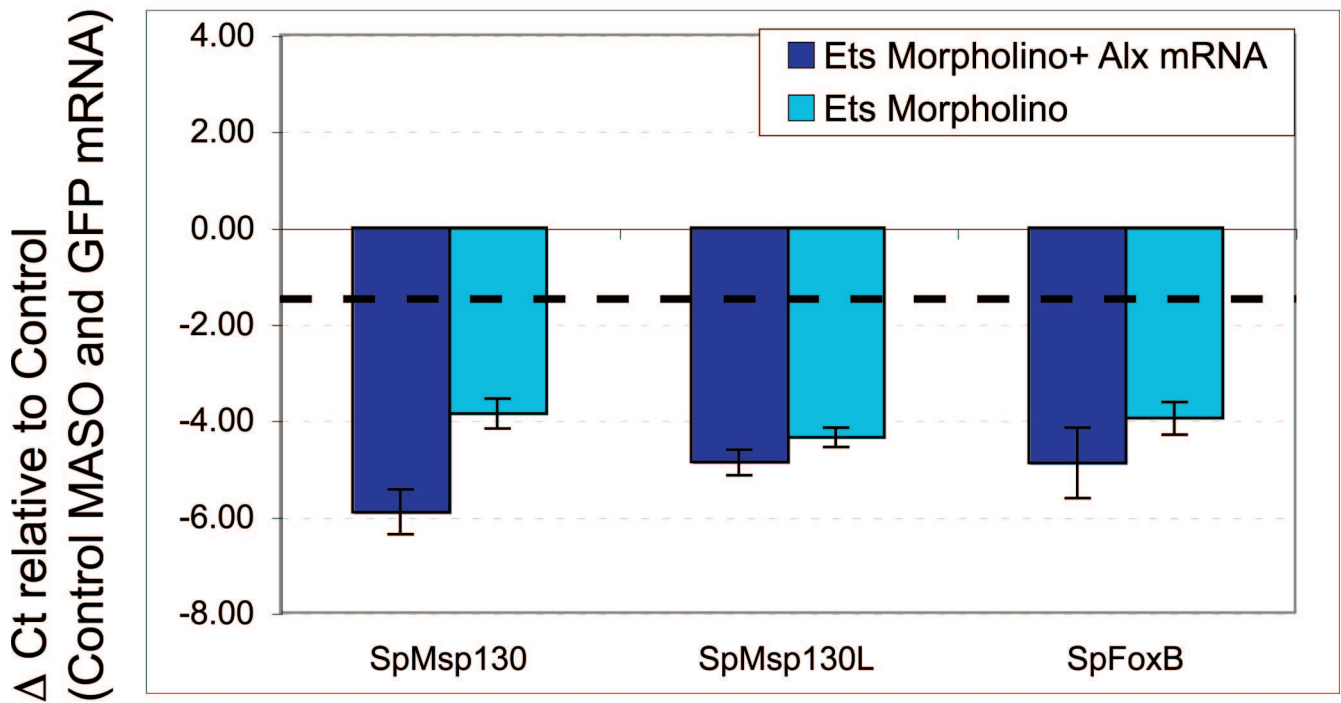

Fig. S7. Confirmation of the feed-forward motif between *ets1*, *alx*, and the downstream genes. The embryos were injected with *ets1* morpholino and *alx1* mRNA. The effects were measured on differentiation genes that show positive inputs from both of these regulatory genes, *msp130*, and *msp-L* (*msp130-L*), and *foxb*. The absence of even minimal rescue by the *alx1* mRNA confirms the feed-forward architecture of the network motif and shows that both inputs are required for the expression of these downstream genes. The quantitative data also suggest the operation of AND logic in the *cis*-regulatory systems of *msp130*, *msp-L*, and *foxb*, such that the Ets1 and Alx1 inputs must be simultaneously present to drive expression. A positive value means increased expression compared with the uninjected embryos, and a negative value means decreased expression.

**Table 1. Feed-forward circuit motifs in the regulation of PMC differentiation genes**

| Regulatory gene A | Regulatory gene B | Differentiation gene C                                          |
|-------------------|-------------------|-----------------------------------------------------------------|
| Ets1              | Alx1              | Sm27, Sm 50, Msp130 <sup>†</sup> , Msp-L <sup>†</sup> , Ficolin |
| Ets1*             | Dri*              | Sm27, Sm50*, Cyclophillin*                                      |
| Ets1*             | Hex               | Sm27, Sm 50*, Msp130, Msp-L, Ficolin                            |
| Ets1*             | Erg*              | Sm27, Sm 50*, Msp130, Msp-L, Ficolin                            |
| Alx1              | Dri*              | Sm27, Sm50*, Cyclophillin*                                      |
| Tbr               | Erg               | Sm27, Sm 50, Msp130, Msp-L, Ficolin                             |
| Erg               | Hex               | Sm27, Sm 50, Msp130, Msp-L, Ficolin                             |

See Fig. 6 for the architecture of these feed-forward loops.

\*These inputs have been validated by *cis*-regulatory analysis.

<sup>†</sup>The AND logic of the Ets1 and Alx1 inputs in the promoters of these genes has been demonstrated by Ets1 morpholino and Alx1 mRNA double perturbation (Fig. S7).



**Table 2. Morpholinos used in this article**

| Name               | Sequence (5'→3')          | Block type  | Working concentration, $\mu$ M | Efficiency validation      |
|--------------------|---------------------------|-------------|--------------------------------|----------------------------|
| <i>alx1</i>        | ATATTGAGTTAAGTCTCGGCACGAC | Translation | 400                            |                            |
| <i>dri</i>         | CTGTCTTCGCTGGTTCTTCAAC    | Translation | 200                            |                            |
| <i>erg</i> *       | GGCTGCTCAATCTCTGTTTCATGC  | Translation | 200                            | GFP construct <sup>†</sup> |
| <i>erg-trans</i> * | GCATATAACAAATTGAGGAACACTG | Translation | 200                            | GFP construct <sup>†</sup> |
| <i>ets1</i>        | GAACAGTGCATAGACGCCATGATTG | Translation | 400                            |                            |
| <i>foxN2/3</i>     | CGGGCAAATCTGTATCCTCCATCTC | Translation | 200                            | GFP construct <sup>†</sup> |
| <i>hex-E3I3</i>    | AGTGGTGAAATTACCTGTTTTAATC | Splicing    | 400                            | QPCR <sup>‡</sup>          |
| <i>soxC</i>        | GAACCATCTTGAAGTCAGCATTAC  | Translation | 400                            | GFP construct <sup>†</sup> |
| <i>tbr</i>         | TGTAATTCTTCTCCATCATGTCTC  | Translation | 400                            |                            |
| <i>tel</i>         | CCTGTCTGGTAGAGGCCGGTCCAT  | Translation | 400                            | GFP construct <sup>†</sup> |
| <i>tgif</i>        | ATCTTTCTGTGGTAAATCCGCATC  | Translation | 400                            | GFP construct <sup>†</sup> |

All morpholino-substituted antisense oligonucleotides were produced by Gene Tools.

\*Perturbations of *erg* were done by the mixture of two morpholinos as 200  $\mu$ M each, because we have identified different alternative splicing forms that are targeted by different morpholinos.

<sup>†</sup>Controls of morpholino knock-down efficiency was conducted on GFP construct in which specific DNA fragments around the morpholino target site ( $\approx$ 300 bp) was cloned in frame with the GFP sequence (1). The mRNA *in vitro*-transcribed (2) from these constructs was injected along with specific and nonspecific morpholinos.

<sup>‡</sup>The presence of unspliced form was quantified by QPCR.

1. Oliveri P, Davidson EH, McClay DR (2003) Activation of *pmar1* controls specification of micromeres in the sea urchin embryo. *Dev Biol* 258:32–43.

2. Oliveri P, Carrick DM, Davidson EH (2002) A regulatory gene network that directs micromere specification in the sea urchin embryo. *Dev Biol* 246:209–228.
